# Supplementary material
Source: publisher figshare collection journal article supplement (https://acs.figshare.com/ndownloader/files/3884149)
Supplement: Supplementary file 1 [file 3884149]

## ***Supporting Information for***

# **Quantifying Biomass Composition by Gas Chromatography/Mass Spectrometry**

Christopher P. Long and Maciek R. Antoniewicz\*

Department of Chemical and Biomolecular Engineering, Metabolic Engineering and Systems Biology Laboratory, University of Delaware, Newark, DE 19716, USA

\*Corresponding author. E-mail: [mranton@udel.edu](mailto:mranton@udel.edu)

This document contains the following information in support of the primary article:

### **Example Isotope Ratio Calculation**

Step 1. Measure the amount of aspartate in fully labeled biomass

Step 2. Measure the amount of aspartate in *E. coli*  $\Delta$ pgi strain

### **Validation of RNA and Glycogen Measurements: The Labeling Switch Experiment.**

Figure S-1. Culture data from the labeling switch experiment.

Figure S-2. Observed labeling of RNA and glycogen over time after the switch to [U-<sup>13</sup>C] labeled substrate.

### **Validation of Method Consistency: Analysis of Labeled and Unlabeled Biomass.**

Figure S-3. The abundance of amino acids in *E. coli* biomass as measured by both approaches.

Figure S-4. The abundance of RNA and glycogen in *E. coli* biomass as measured by both approaches.

Figure S-5. The abundance of fatty acids in *E. coli* biomass as measured by both approaches.

## **Example Isotope Ratio Calculation**

For all isotope ratio calculations, mass isotopomer distributions (MID) are first corrected for natural isotope abundances using the method of Fernandez et. al.<sup>1</sup> In the example below, we show how the amount of protein-bound aspartate in *E. coli*  $\Delta pgi$  strain is determined using GC-MS data for aspartate fragment at  $m/z$  418.

### **Step 1. Measure the amount of aspartate in fully labeled biomass standard.**

First, we measure MIDs for the “fully labeled” biomass standard, and a mixture of the biomass standard with an unlabeled amino acid standard with a known concentration. Here, for the unlabeled amino acid standard, 40  $\mu$ L of a 2.5 mM (per amino acid) solution was used. Note: the measured biomass Asp content corresponds to the sum of biological Asp and Asn (denoted by Asx). The standard solution contains only Asp. The unlabeled standard is assumed to have natural isotopic labeling (i.e.  $M_0 = 1$ ).

#### **Step 1a. Measure MID for fully labeled biomass standard**

|             |        |
|-------------|--------|
| Asp418 (M0) | 0.0135 |
| Asp418 (M1) | 0.0016 |
| Asp418 (M2) | 0.0127 |
| Asp418 (M3) | 0.1639 |
| Asp418 (M4) | 0.8126 |

$$\text{“Labeled”} \quad L = M(N) + M(N - 1) = 0.1639 + 0.8126 = 0.9765 \quad \text{Eq. 1a}$$

$$\text{“Unlabeled”} \quad U = M(0) = 0.0135 \quad \text{Eq. 1b}$$

Notes: The M0 (~1.4%) is coming from the unlabeled inoculum. The M3 (~16%) is a result of incomplete labeling of [U-<sup>13</sup>C]glucose tracer (~98.5% <sup>13</sup>C) as well as fixation of unlabeled atmospheric CO<sub>2</sub>.

Next, we calculate the fractions of L and U:

$$X_{L,BM} = \frac{L}{L + U} = 0.986$$

$$X_{U,BM} = 1 - X_{L,BM} = 0.014$$

Step 1b. Measure MIDs for mixtures of fully labeled biomass + 100 nmol unlabeled Asp  
(3 replicates)

|                            | <i>Rep 1</i>  | <i>Rep2</i>   | <i>Rep 3</i>  |
|----------------------------|---------------|---------------|---------------|
| Asp418 (M0)                | 0.4427        | 0.4323        | 0.4134        |
| Asp418 (M1)                | 0.0000        | 0.0000        | 0.0000        |
| Asp418 (M2)                | 0.0069        | 0.0068        | 0.0072        |
| Asp418 (M3)                | 0.0927        | 0.0945        | 0.0964        |
| Asp418 (M4)                | 0.4619        | 0.4699        | 0.4848        |
| " <b>L<sub>mix</sub></b> " | <b>0.5546</b> | <b>0.5644</b> | <b>0.5812</b> |
| " <b>U<sub>mix</sub></b> " | <b>0.4427</b> | <b>0.4323</b> | <b>0.4134</b> |

These values are corrected for the unlabeled content of the labeled biomass standard as follows:

$$\left(\frac{L}{U}\right)_{corrected} = \frac{L_{mix}}{U_{mix} \times X_{L,BM} - L_{mix} \times X_{U,BM}} \quad \text{Eq. 2}$$

|             | <i>Rep 1</i> | <i>Rep 2</i> | <i>Rep 3</i> | <i>Avg</i> |
|-------------|--------------|--------------|--------------|------------|
| L/U (corr.) | 1.292        | 1.348        | 1.454        | 1.365      |

Amount of Asp in the unlabeled amino acid standard added:

$$40\mu\text{L} \times 2.5 \text{ mM} = 100 \text{ nmol}$$

Thus, the amount of Asp in fully labeled biomass is:

$$1.365 \times 100 \text{ nmol} = \underline{136.5 \text{ nmol}}$$

Step 2. Measure the amount of aspartate in *E. coli*  $\Delta pgi$  strain.

Since *E. coli*  $\Delta pgi$  cultures were grown on naturally labeled glucose, they are assumed to have only naturally labeling (i.e.  $M_0 = 1$ , after correction for natural abundances).

Step 2a. Measure MIDs for mixtures of fully labeled biomass +  $\Delta pgi$  samples  
(4 replicates)

|                   | Rep 1         | Rep 2         | Rep 3         | Rep 4         |
|-------------------|---------------|---------------|---------------|---------------|
| Asp418 (M0)       | 0.5182        | 0.5086        | 0.4836        | 0.4978        |
| Asp418 (M1)       | 0.0000        | 0.0000        | 0.0000        | 0.0000        |
| Asp418 (M2)       | 0.0059        | 0.0058        | 0.0064        | 0.0064        |
| Asp418 (M3)       | 0.0807        | 0.0817        | 0.0856        | 0.084         |
| Asp418 (M4)       | 0.3997        | 0.4076        | 0.4275        | 0.416         |
| “ $L_{pgi,mix}$ ” | <b>0.4804</b> | <b>0.4893</b> | <b>0.5131</b> | <b>0.5000</b> |
| “ $U_{pgi,mix}$ ” | <b>0.5182</b> | <b>0.5086</b> | <b>0.4836</b> | <b>0.4978</b> |

These values are corrected in the same way as above for the presence of unlabeled material in the “labeled” biomass standard.

Then, the Asp content is calculated by multiplying the corrected L/U by the known Asp content of the labeled biomass standard (i.e. 136.5 nmol)

|             | Rep 1 | Rep 2 | Rep 3 | Rep 4 |
|-------------|-------|-------|-------|-------|
| L/U (corr.) | 0.952 | 0.989 | 1.092 | 1.033 |
| Asp (nmol)  | 143.3 | 138.1 | 125.0 | 131.4 |

Thus, the amount of Asp in *E. coli*  $\Delta pgi$  strain is:  $134.6 \pm 7.9$  nmol

We wish to report the composition in  $\mu\text{mol}/g_{dw}$ , so we must also have the dry weight of the sample. This was measured independently for the  $\Delta pgi$  strain to be 0.306  $\text{mg}_{dw}/(\text{mL} \cdot \text{OD})$ . All biomass samples here were an equivalent of 1 mL of OD = 1.

$$134.6 \frac{\text{nmol Asp}}{\text{mL} - \text{OD}} \times \frac{1}{0.306 \frac{\text{mg}_{dw}}{\text{mL} - \text{OD}}} = 439 \frac{\text{nmol}}{\text{mg}_{dw}} = 439 \frac{\mu\text{mol}}{g_{dw}}$$

The standard error of the mean is calculated as:

$$\sigma = 7.9 \frac{nmol}{mL - OD} \times \frac{1}{0.306 \frac{mg_{dw}}{mL - OD}} = 25.7 \frac{\mu mol}{g_{dw}}$$

$$SEM = \frac{\sigma}{\sqrt{n}} = \frac{25.7}{\sqrt{4}} = 12.8 \frac{\mu mol}{g_{dw}}$$

Note: In the primary article, the reported Asx values are an average of three values, based on the analysis of Asp fragments Asp302, Asp390, and Asp418, each calculated as above.

### **Validation of RNA and Glycogen Measurements: The Labeling Switch Experiment.**

The RNA and glycogen measurements were validated to ensure that the target analytes were the desired biomass components, and not other intracellular metabolites such as sugar phosphates. A culture of WT *E. coli* was grown to an OD of 0.5 on unlabeled glucose, was centrifuged and then re-suspended in media containing only fully [U-<sup>13</sup>C] labeled glucose (at t = 0). Figure S1 shows the culture data following that point, with respect to measured OD<sub>600</sub> as well as the calculated percentage of new biomass (i.e. generated after t=0). Figure S2 shows the measured RNA and glycogen labeling over the time course. Rapid and complete labeling would have been indicative of the measurement of fast-turnover species such as intracellular metabolites, while a labeling trend similar to the increasing fraction of new labeled biomass would be indicative of the measurement of slow-turnover biomass components. The latter was observed, validating the RNA and glycogen measurements.

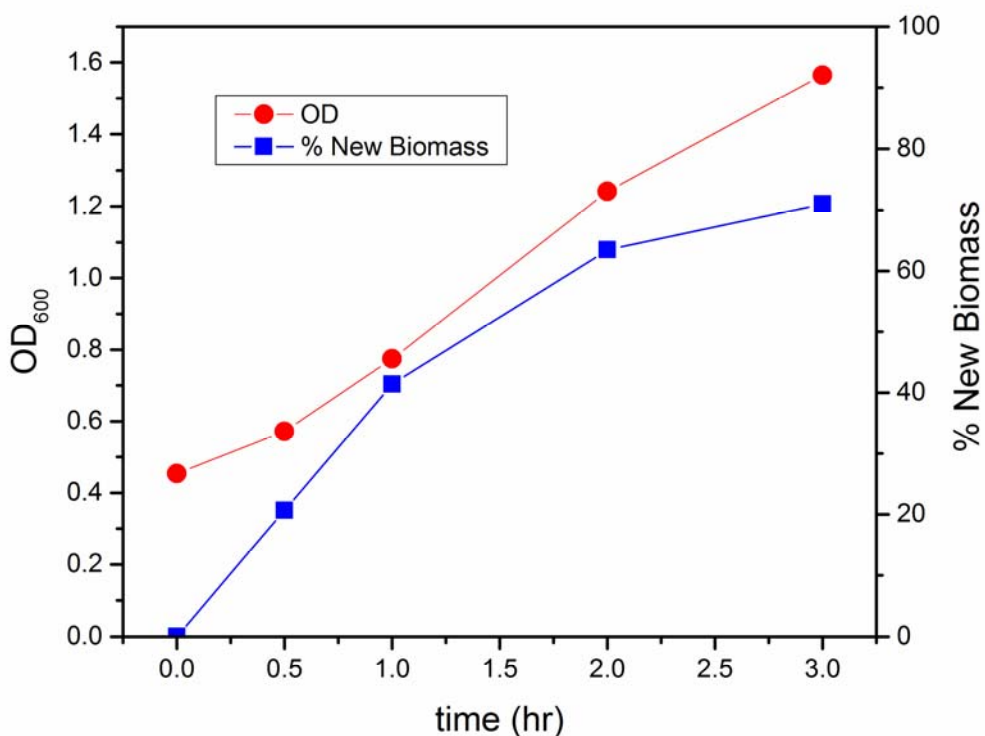

**Figure S-1.** Culture data from the labeling switch experiment.

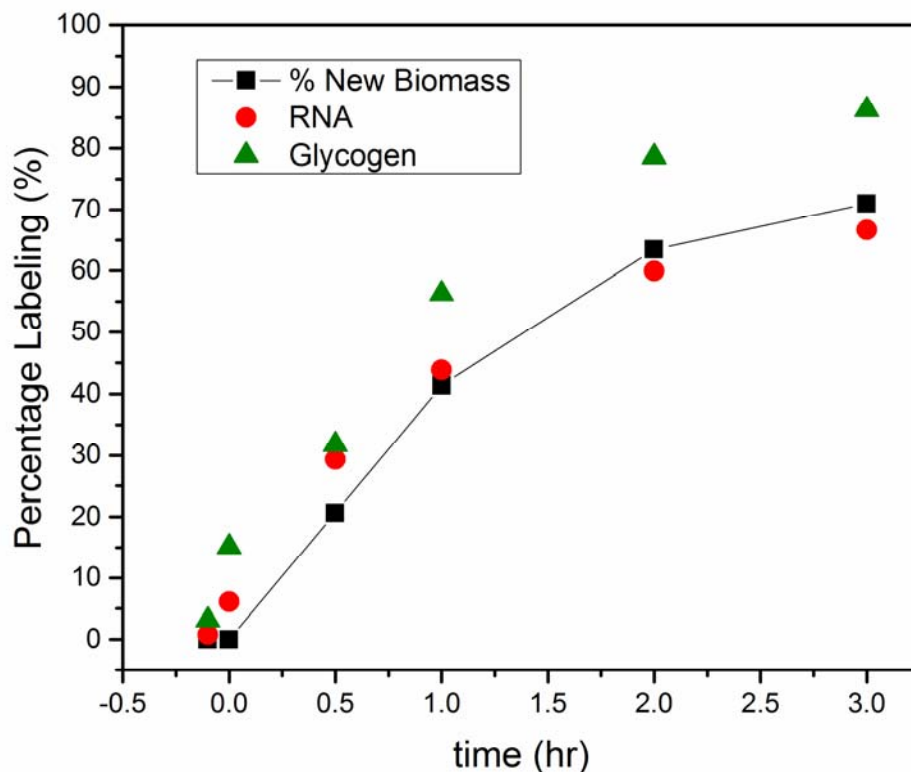

**Figure S-2.** Observed labeling of RNA and glycogen over time after the switch to [U- $^{13}\text{C}$ ] labeled substrate. The measurement before  $t=0$  was prior to the switch. Overall, the trends indicate the measurement of slow-turnover biomass components.

#### **Validation of Method Consistency: Analysis of Labeled and Unlabeled Biomass.**

Two *E. coli* cultures were grown in parallel, one on unlabeled glucose and one on fully [U- $^{13}\text{C}$ ] labeled glucose. The labeled biomass was analyzed using unlabeled chemical standards, while the unlabeled biomass was analyzed using a reference fully labeled biomass reference. This labeled biomass standard was one of a large stock of fully labeled *E. coli* culture, which had been previously grown and characterized relative to unlabeled chemical standards. The consistency of results from both approaches demonstrates the reproducibility and flexibility of these methods. Results for the measured biomass components are shown below in Figures S3-S5.

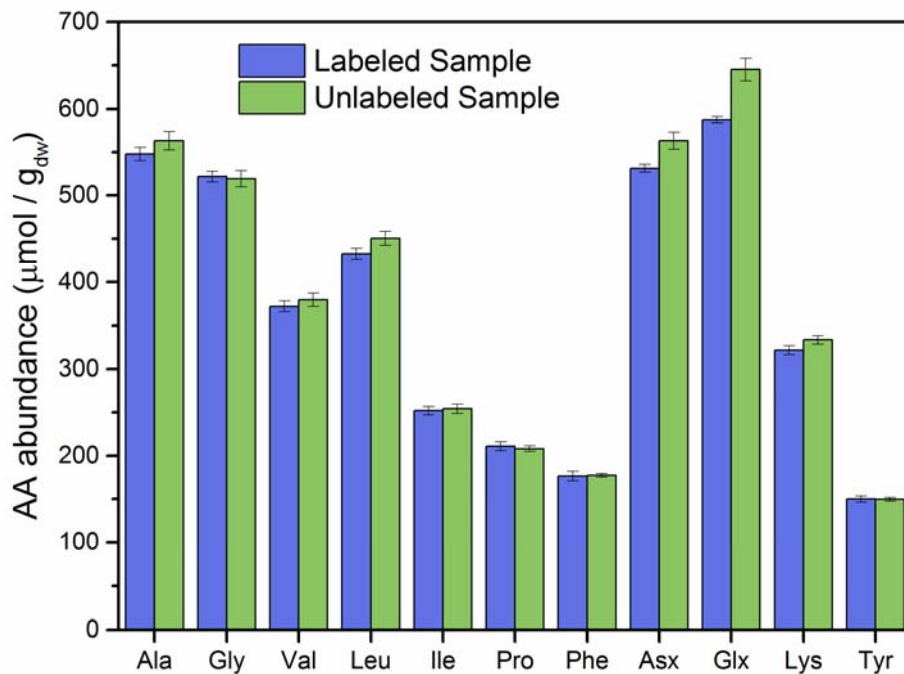

**Figure S-3.** The abundance of amino acids in *E. coli* biomass as measured by both approaches. Error bars indicate typical measurement uncertainty for both approaches.

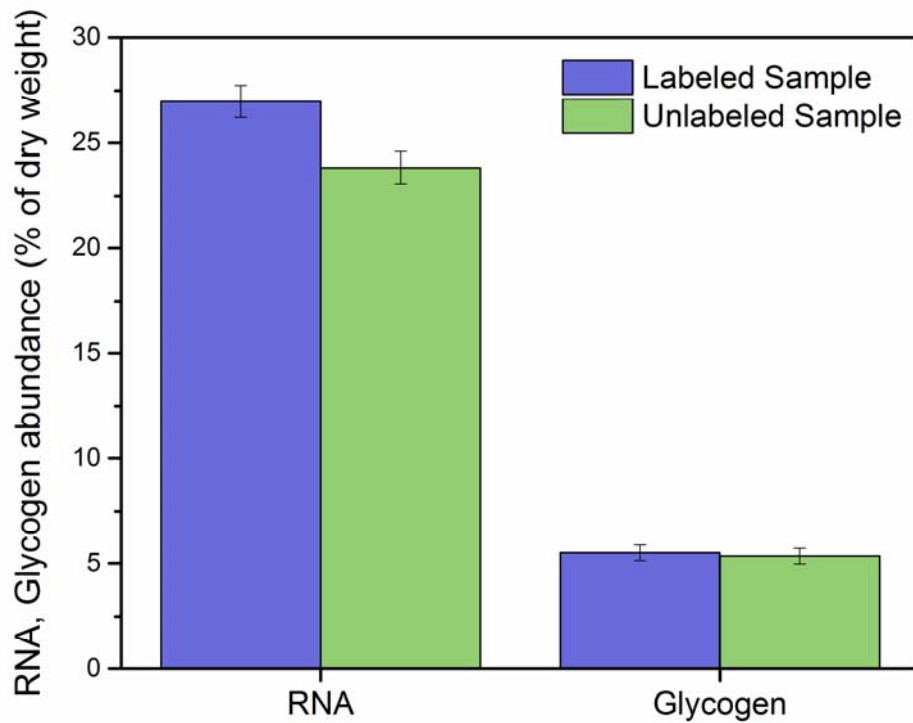

**Figure S-4.** The abundance of RNA and glycogen in *E. coli* biomass as measured by both approaches. Error bars indicate typical measurement uncertainty.

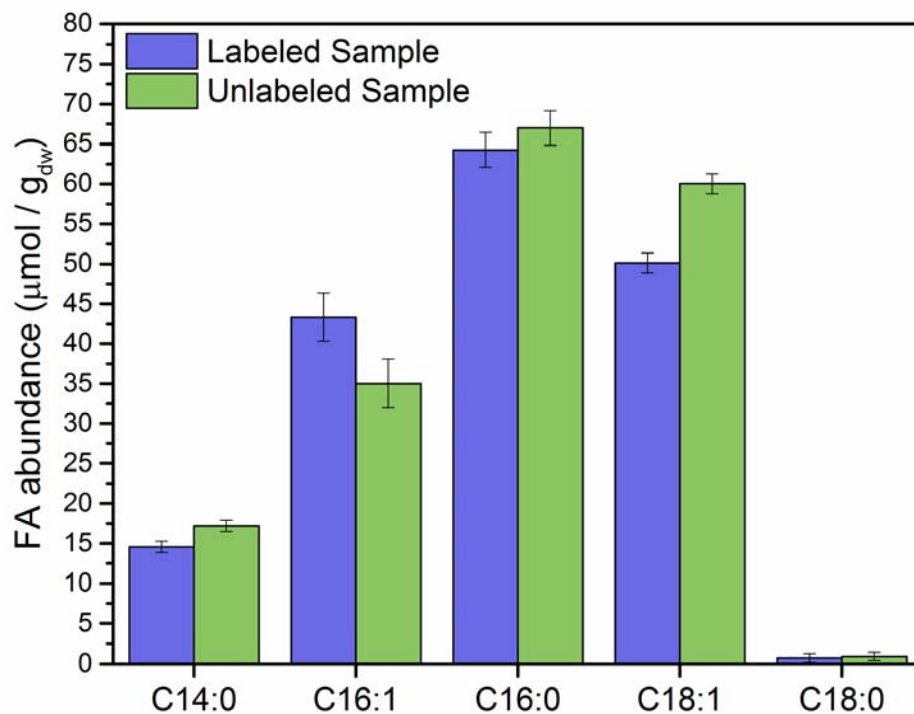

**Figure S-5.** The abundance of fatty acids in *E. coli* biomass as measured by both approaches. Error bars indicate typical measurement uncertainty for both approaches.

## **References**

- (1) Fernandez, C. a; Des Rosiers, C.; Previs, S. F.; David, F.; Brunengraber, H. J. *Mass Spectrom.* **1996**, 31, 255–262.
